# Supplementary material for: Intra-session reliability of isometric muscle strength of the bilateral standing press in female handball players
Source: PeerJ. 2024 Sep 26;12:e18196. doi: 10.7717/peerj.18196 (PMC11439392; doi:10.7717/peerj.18196)
Supplement: Supplemental Information 1 [file peerj-12-18196-s001.xlsx]

## Sheet: Mean and Peak Strenght
subjects	Peak Strength_1	Mean Strenght 1	Peak Strength_2	Mean Strenght 2	Peak Strength_3	Mean Strenght 3
1	35.74	27.28	41.91	27.17	39.54	29.68
2	47.21	31.17	43.97	30.73	41.04	27.89
3	34.18	27.28	35.8	25.36	33.3	25.25
4	26.57	19.32	25.94	22.13	25.2	21.85
5	28.06	22.86	27.38	24.38	30.43	24.23
6	32.49	24.24	29.62	24.48	29.87	23.94
7	18.58	16.65	18.21	17.25	24.01	20.58
8	26.01	22.54	25.51	21.56	26.07	22.59
9	29.87	26.2	29.46	26	29.44	27
10	31.74	25.89	33.24	28.63	34.05	29.57
11	47.83	29.66	36.55	25.61	41.04	25.78
12	28.19	24.62	28.81	24.45	28.94	25.53
13	26.75	21.42	31.81	23.54	29.19	23.95
14	23.57	20.76	24.26	20.64	23.45	20.41
15	26.01	22.74	24.76	19.85	32.49	22.64
16	37.61	21.35	32.87	19.04	32.06	22.52
