# Supplementary material for: Intra-session reliability of isometric muscle strength of the bilateral standing press in female handball players
Source: PeerJ. 2024 Sep 26;12:e18196. doi: 10.7717/peerj.18196 (PMC11439392; doi:10.7717/peerj.18196)
Supplement: Supplemental Information 2 [file peerj-12-18196-s002.xlsx]

## Sheet: Reliability_1-2
	CONSECUTIVE PAIRWISE ANALYSIS OF TRIALS FOR RELIABILITY
	Hover cursor for citation:
	Hover cursor for updates:		2015	2012	2010	2009
	This spreadsheet calculates reliability statistics for consecutive pairs of trials and for the means of these statistics when there are >2 trials.
	For trials spaced at equal intervals, these means are better estimates of test-retest reliability than the more usual ANOVA-based reliablity statistics.
	But see the 1-way and 2-way spreadsheets in this workbook for such analyses.
	The reliability statistics are calculated for raw data and after log transformation.
	I generated the data shown with http://www.sportsci.org/2007/SimulateSamples.xls. See the accompanying article at http://www.sportsci.org/2007/wghstats.htm.
	I deliberately chose data with large errors that are clearly better analyzed via log transformation to give percent or factor effects and errors.
	Unless your data are times to exhaustion or gene transcription scores, they won't be so obviously in need of log transformaiton, but log transformaiton may still be better.
	Delete and replace the numbers in blue. Stats you might want are in red. Don't change any cells with a colored background.
	Missing values must be blanks or the graphs will display incorrectly. (The X values will plot as consecutive integers.)
	Clear all the #NUM! corresponding to missing raw values from the log-transformed panel. Restore the formula (by copying an adjacent cell) if you restore a missing value or for new data.
	Check the graphs (especially of the change scores) for outliers and non-uniformity of scatter. The log-transformed variables may show less non-uniformity, as evident in these data.
	For more than 20 subjects, COPY any number of rows after the first data row and INSERT in the same place without deselecting.
	Do NOT copy and insert the first data row.											Use analysis of RAW data in one or more of the following situations:										Use LOG transformation in one or more of the following situations:
	Double-click on any of the red mean or SD cells to check that you have done this operation properly.											the data can be zero or negative;										the data can only be positive and non-zero;
	Colored boxes should enclose all rows of your data.											the data were measured from an arbitrary reference value;										the within-subject, between-subject or between-trial SD is more than ~20% of the mean;
	For less than 20 subjects, delete or clear any unwanted or empty rows.											the magnitude of the error is expected to be similar for all subjects.										the magnitude of the percent or factor error is expected to be similar for all subjects.
	To remove a trial, clear its data, or set the corrresponding "Include which trials?" cell to 0 or blank.
	For more than 6 trials, copy and insert the entire column(s) for Trials 5 and/or 6 and their change scores for the RAW and the LOG data.											Missing values produce delete in the panel of change scores.										Missing values produce #NUM! in the panel of log-transformed data.							Missing values produce delete in the panel of change scores.
	And follow the instructions in the cells indicated by "Hover cursor for >6 trials". If such editing is too difficult for you, contact me.											Clear delete from these cells to stop them plotting as zeros.										Clear #NUM! from these cells to get complete analyses.							Clear delete from these cells to stop them plotting as zeros.
												Copy-paste or -drag to restore formulae to those cells if you enter new data.										Copy-paste or -drag to restore formulae to those cells if you enter new data.							Copy-paste or -drag to restore formulae to those cells if you enter new data.
		Choose smallest effect:	0.2
		Choose conf. limits (%):	95			Hover cursor for >6 trials:	Read	me				Hover cursor for >6 trials:	Read me	Read	me	Do not							Hover cursor for >6 trials:	Read me	Read	me	Do not			Hover cursor for >6 trials:	Read me	Read	me	Do not
		RAW Data									Change scores of raw data					modify	Any				100*LOG-Transformed Data						modify		Change scores of Log-transformed data					modify	Any
		Trial:	1	2	3	4	5	6	Mean		2-1	3-2	4-3	5-4	6-5	this col.	subject?				1	2	3	4	5	6	this col.		2-1	3-2	4-3	5-4	6-5	this col.	subject?
		1	146.348	156.673
		2	190.741	196.915
		3	121.466	132.847
		4	207.756	214.88
		5	154.759	155.213
		6	171.428	189.36							17.9318	delete					1			S02	514.416	524.365							9.94854						0
		7	177.868	184.073							6.20528	delete					1			S05	518.104	521.533							3.42923						0
		8	187.46	191.13							3.66995	delete	delete	delete	delete		1			S07	523.357	525.295	#NUM!	#NUM!	#NUM!	#NUM!			1.93881	delete	delete	delete	delete		#NUM!
		9	167.578	177.316							9.73859	delete	delete	delete	delete		1			S08	512.145	517.793	#NUM!	#NUM!	#NUM!	#NUM!			5.6488	delete	delete	delete	delete		#NUM!
		10	162.426	167.205							4.77967	delete	delete	delete	delete		1			S09	509.022	511.922	#NUM!	#NUM!	#NUM!	#NUM!			2.90022	delete	delete	delete	delete		#NUM!
		11	175.334	182.751							7.41723	delete	delete	delete	delete		1			S10	516.669	520.813	#NUM!	#NUM!	#NUM!	#NUM!			4.14331	delete	delete	delete	delete		#NUM!
		12	191.696	203.118							11.4215	delete	delete	delete	delete		1			S12	525.591	531.379	#NUM!	#NUM!	#NUM!	#NUM!			5.78736	delete	delete	delete	delete		#NUM!
		13	125.564	138.142							12.5784	delete	delete	delete	delete		1			S14	483.281	492.828	#NUM!	#NUM!	#NUM!	#NUM!			9.54696	delete	delete	delete	delete		#NUM!
		14	135.726	140.884							5.1577	delete	delete	delete	delete		1			S15	491.064	494.794	#NUM!	#NUM!	#NUM!	#NUM!			3.72966	delete	delete	delete	delete		#NUM!
		15	165.514	171.607							6.09355	delete
		16	158.83	165.43							6.60002	delete	delete	delete	delete		1			S16	506.784	510.855	#NUM!	#NUM!	#NUM!	#NUM!			4.07137	delete	delete	delete	delete		#NUM!
		17	194.142	206.274							12.1324	delete	delete	delete	delete		1			S17	526.859	532.921	#NUM!	#NUM!	#NUM!	#NUM!			6.06175	delete	delete	delete	delete		#NUM!
		18	162.836	178.264							15.4282	delete
		19	137.739	153.794							16.0551	delete	delete	delete	delete		1			S20	492.536	503.562	#NUM!	#NUM!	#NUM!	#NUM!			11.0254	delete	delete	delete	delete		#NUM!
		20	96.3164	105.498							9.18118	delete	delete	delete	delete		1			S22	456.764	465.869	#NUM!	#NUM!	#NUM!	#NUM!			9.10494	delete	delete	delete	delete		#NUM!
		21	195.306	204.925							9.61855	delete	delete	delete	delete		1			S23	527.457	532.264	#NUM!	#NUM!	#NUM!	#NUM!			4.80743	delete	delete	delete	delete		#NUM!
		Mean	162.86	172.486					167.673	Mean of change	9.62557					Mean	#REF!			Mean							#DIV/0!	Mean							#REF!
		SD	44.242	45.4183					44.834	SD of change	4.3171					4.3171				SD							#DIV/0!	SD						#REF!
		Total no. of subjects	16	16	0	0	0	0	#REF!	Total no. of subjects	16	0	0	0	0	#REF!				N	0	0	0	0	0	0		N	0	0	0	0	0
		Include which trials?	1	1	1	1	0	0												Include which trials?	1	1	1	1	0	0
		DF	15	15	0	0	0	0	#REF!											DF	0	0	0	0	0	0	Mean	Factor change in mean						Mean
																				Back-transformed mean								SD of change as a factor
																				SD as a ×/÷ factor								Change in mean (%)
	For your data, you may have to set max and min values of X and Y axes to appropriate values.																			SD as a CV (%)								SD of change as CV (%)
									Measures of reliability via the RAW variable											Total no. of subjects	0	0	0	0	0	0	#REF!	Total no. of subjects	0	0	0	0	0	#REF!
									Raw	Trials	2-1	3-2	4-3	5-4	6-5	Mean											Measures of reliability via the LOG-TRANSFORMED variable
							P-Value			Change in mean	9.62557								Clear #NUM! and "delete" from the log-transformed cells to stop them plotting as zeros.								Factors	Trials	2-1	3-2	4-3	5-4	6-5	Mean
							2.203e-07			Lower conf. limit	7.32515								Restore the log-transformation formula to those cells if you enter new data.									Factor change in mean
										Upper conf. limit	11.926																	Lower conf. limit
							CV			Conf. limits as ±value	2.30042																	Upper conf. limit
							1.8206			Typical error	3.05265					3.05265												Conf. limits as ×/÷factor
							1.34488			Lower conf. limit	2.25501					2.25501												Factor typical error
							2.81772			Upper conf. limit	4.72456					4.72456												Lower conf. limit
										Conf. limits as approx. ×/÷factor	1.44746					1.44746												Upper conf. limit
							ES			Bias correction factor	1.01667					1.01667												Conf. limits as approx. ×/÷factor
							0.214693			Smallest effect from pure SD	8.94599					#REF!												Bias correction factor
										Lower conf. limit	4.74219					#REF!												Smallest effect from pure SD
							BS-SD			Upper conf. limit	11.7292					#REF!												Lower conf. limit
							26.739			Smallest effect from observed SD	8.9668					8.9668												Upper conf. limit
										Lower conf. limit	6.62382					#REF!												Smallest effect from observed SD
										Upper conf. limit	13.8778					#REF!												Lower conf. limit
										Degrees of freedom	15	0	0	0	0	15												Upper conf. limit
									Standardized (when ICC>0)																			Degrees of freedom	0	0	0	0	0
										Change in mean	0.215193																Percents
										Lower conf. limit	0.163764																	Change in mean (%)
										Upper conf. limit	0.266622																	Lower conf. limit
										Conf. limits as ±value	0.051429																	Upper conf. limit
										Typical error	0.0682462					0.0680878												Conf. limits as approx. ±value
										Lower conf. limit	0.0504138					0.0502968												Typical error as a CV (%)
										Upper conf. limit	0.105624					0.105379												Lower conf. limit
										Conf. limits as approx. ×/÷factor	1.44746					1.44746												Upper conf. limit
										Bias correction factor	1.01667					1.01667												Conf. limits as approx. ×/÷factor
									Correlations																			Bias correction factor
										Pearson correlation	0.988414					0.988414												Smallest effect from pure SD
										Lower conf. limit	0.966025																	Lower conf. limit
										Upper conf. limit	0.996079																	Upper conf. limit
										Bias correction factor	1.00096																	Smallest effect from observed SD
										Intraclass correlation (ICC)	0.996072					#REF!												Lower conf. limit
										Lower conf. limit	0.9888					#REF!												Upper conf. limit
										Upper conf. limit	0.998626					#REF!											Standardized (when ICC>0)
										Effective no. of trials	2					#REF!												Change in mean
										F	508.207					#REF!												Lower conf. limit
										Numerator DF	15					#REF!												Upper conf. limit
										Denominator DF	15	0	0	0	0	15												Conf. limits as ±value
										F lower	177.565					#REF!												Typical error
										F upper	1454.54					#REF!												Lower conf. limit
										Fisher r	2.57267					2.57267												Upper conf. limit
										Fisher SE^-2	13																	Conf. limits as approx. ×/÷factor
										Pure variance	2000.77					#REF!												Bias correction factor
										SE of pure variance	733.972					#REF!											Correlations
										LCL	562.21					#REF!												Pearson correlation
										UCL	3439.33					#REF!												Lower conf. limit
																												Upper conf. limit
																												Bias correction factor
																												Intraclass correlation
																												Lower conf. limit
																												Upper conf. limit
																											Measures of reliability of log-transformed variable
																													2-1	3-2	4-3	5-4	6-5	Mean
																												Change in mean
																												Lower conf. limit
																												Upper conf. limit
																												Typical error						#REF!
																												Lower conf. limit						#REF!
																												Upper conf. limit						#REF!
																												Bias correction factor
																												Smallest effect from pure SD						#REF!
																												Lower conf. limit						#REF!
																												Upper conf. limit						#REF!
																												Smallest effect from observed SD						#DIV/0!
																												Lower conf. limit						#REF!
																												Upper conf. limit						#REF!
																												DF	0	0	0	0	0	#REF!
																												Stdized change in mean
																												Lower conf. limit
																												Upper conf. limit
																												Stdized typical error
																												Lower conf. limit
																												Upper conf. limit
																												Pearson r						#DIV/0!
																												Lower conf. limit
																												Upper conf. limit
																												Bias correction factor
																												Intraclass r						#REF!
																												Lower conf. limit						#REF!
																												Upper conf. limit						#REF!
																												Effective no. of trials						#REF!
																												F						#REF!
																												Numerator DF	0					#REF!
																												Denominator DF	0	0	0	0	0	#REF!
																												F lower						#REF!
																												F upper						#REF!
																												Fisher r						#DIV/0!
																												Fisher SE^-2
																												Pure variance						#REF!
																												SE of pure variance						#REF!
																												LCL						#REF!
																												UCL						#REF!

## Sheet: Reliability_1-3
	CONSECUTIVE PAIRWISE ANALYSIS OF TRIALS FOR RELIABILITY
	Hover cursor for citation:
	Hover cursor for updates:		2015	2012	2010	2009
	This spreadsheet calculates reliability statistics for consecutive pairs of trials and for the means of these statistics when there are >2 trials.
	For trials spaced at equal intervals, these means are better estimates of test-retest reliability than the more usual ANOVA-based reliablity statistics.
	But see the 1-way and 2-way spreadsheets in this workbook for such analyses.
	The reliability statistics are calculated for raw data and after log transformation.
	I generated the data shown with http://www.sportsci.org/2007/SimulateSamples.xls. See the accompanying article at http://www.sportsci.org/2007/wghstats.htm.
	I deliberately chose data with large errors that are clearly better analyzed via log transformation to give percent or factor effects and errors.
	Unless your data are times to exhaustion or gene transcription scores, they won't be so obviously in need of log transformaiton, but log transformaiton may still be better.
	Delete and replace the numbers in blue. Stats you might want are in red. Don't change any cells with a colored background.
	Missing values must be blanks or the graphs will display incorrectly. (The X values will plot as consecutive integers.)
	Clear all the #NUM! corresponding to missing raw values from the log-transformed panel. Restore the formula (by copying an adjacent cell) if you restore a missing value or for new data.
	Check the graphs (especially of the change scores) for outliers and non-uniformity of scatter. The log-transformed variables may show less non-uniformity, as evident in these data.
	For more than 20 subjects, COPY any number of rows after the first data row and INSERT in the same place without deselecting.
	Do NOT copy and insert the first data row.											Use analysis of RAW data in one or more of the following situations:										Use LOG transformation in one or more of the following situations:
	Double-click on any of the red mean or SD cells to check that you have done this operation properly.											the data can be zero or negative;										the data can only be positive and non-zero;
	Colored boxes should enclose all rows of your data.											the data were measured from an arbitrary reference value;										the within-subject, between-subject or between-trial SD is more than ~20% of the mean;
	For less than 20 subjects, delete or clear any unwanted or empty rows.											the magnitude of the error is expected to be similar for all subjects.										the magnitude of the percent or factor error is expected to be similar for all subjects.
	To remove a trial, clear its data, or set the corrresponding "Include which trials?" cell to 0 or blank.
	For more than 6 trials, copy and insert the entire column(s) for Trials 5 and/or 6 and their change scores for the RAW and the LOG data.											Missing values produce delete in the panel of change scores.										Missing values produce #NUM! in the panel of log-transformed data.							Missing values produce delete in the panel of change scores.
	And follow the instructions in the cells indicated by "Hover cursor for >6 trials". If such editing is too difficult for you, contact me.											Clear delete from these cells to stop them plotting as zeros.										Clear #NUM! from these cells to get complete analyses.							Clear delete from these cells to stop them plotting as zeros.
												Copy-paste or -drag to restore formulae to those cells if you enter new data.										Copy-paste or -drag to restore formulae to those cells if you enter new data.							Copy-paste or -drag to restore formulae to those cells if you enter new data.
		Choose smallest effect:	0.2
		Choose conf. limits (%):	95			Hover cursor for >6 trials:	Read	me				Hover cursor for >6 trials:	Read me	Read	me	Do not							Hover cursor for >6 trials:	Read me	Read	me	Do not			Hover cursor for >6 trials:	Read me	Read	me	Do not
		RAW Data									Change scores of raw data					modify	Any				100*LOG-Transformed Data						modify		Change scores of Log-transformed data					modify	Any
		Trial:	1	2	3	4	5	6	Mean		2-1	3-2	4-3	5-4	6-5	this col.	subject?				1	2	3	4	5	6	this col.		2-1	3-2	4-3	5-4	6-5	this col.	subject?
			35.74	39.54							3.8	delete					1			S02	357.627	367.731							10.1042						0
			47.21	41.04							-6.17	delete					1			S05	385.461	371.455							-14.0059						0
			34.18	33.3							-0.88	delete	delete	delete	delete		1			S07	353.164	350.556	#NUM!	#NUM!	#NUM!	#NUM!			-2.60833	delete	delete	delete	delete		#NUM!
			26.57	25.2							-1.37	delete	delete	delete	delete		1			S08	327.978	322.684	#NUM!	#NUM!	#NUM!	#NUM!			-5.29388	delete	delete	delete	delete		#NUM!
			28.06	30.43							2.37	delete	delete	delete	delete		1			S09	333.435	341.543	#NUM!	#NUM!	#NUM!	#NUM!			8.10839	delete	delete	delete	delete		#NUM!
			32.49	29.87							-2.62	delete	delete	delete	delete		1			S10	348.093	339.685	#NUM!	#NUM!	#NUM!	#NUM!			-8.40777	delete	delete	delete	delete		#NUM!
			18.58	24.01							5.43	delete	delete	delete	delete		1			S12	292.209	317.847	#NUM!	#NUM!	#NUM!	#NUM!			25.6385	delete	delete	delete	delete		#NUM!
			26.01	26.07							0.06	delete	delete	delete	delete		1			S14	325.848	326.079	#NUM!	#NUM!	#NUM!	#NUM!			0.230415	delete	delete	delete	delete		#NUM!
			29.87	29.44							-0.43	delete	delete	delete	delete		1			S15	339.685	338.235	#NUM!	#NUM!	#NUM!	#NUM!			-1.45003	delete	delete	delete	delete		#NUM!
			31.74	34.05							2.31	delete	delete	delete	delete		1			S16	345.758	352.783	#NUM!	#NUM!	#NUM!	#NUM!			7.02523	delete	delete	delete	delete		#NUM!
			47.83	41.04							-6.79	delete	delete	delete	delete		1			S17	386.765	371.455	#NUM!	#NUM!	#NUM!	#NUM!			-15.3106	delete	delete	delete	delete		#NUM!
			28.19	28.94							0.75	delete	delete	delete	delete		1			S20	333.897	336.522	#NUM!	#NUM!	#NUM!	#NUM!			2.62574	delete	delete	delete	delete		#NUM!
			26.75	29.19							2.44	delete	delete	delete	delete		1			S22	328.653	337.383	#NUM!	#NUM!	#NUM!	#NUM!			8.72917	delete	delete	delete	delete		#NUM!
			23.57	23.45							-0.12	delete	delete	delete	delete		1			S23	315.997	315.487	#NUM!	#NUM!	#NUM!	#NUM!			-0.510422	delete	delete	delete	delete		#NUM!
			26.01	32.49							6.48	delete	delete	delete	delete		1			S24	325.848	348.093	#NUM!	#NUM!	#NUM!	#NUM!			22.2451	delete	delete	delete	delete		#NUM!
			37.61	32.06							-5.55	delete	delete	delete	delete		1			S25	#REF!	#REF!	#NUM!	#NUM!	#NUM!	#NUM!			delete	delete	delete	delete	delete		#REF!
		Mean	31.2756	31.2575					31.2666	Mean of change	-0.018125					Mean	#REF!			Mean							#DIV/0!	Mean							#REF!
		SD	10.6104	8.91775					9.8007	SD of change	3.89934					3.89934				SD							#DIV/0!	SD						#REF!
		Total no. of subjects	16	16	0	0	0	0	#REF!	Total no. of subjects	16	0	0	0	0	#REF!				N	0	0	0	0	0	0		N	0	0	0	0	0
		Include which trials?	1	1	1	1	0	0												Include which trials?	1	1	1	1	0	0
		DF	15	15	0	0	0	0	#REF!											DF	0	0	0	0	0	0	Mean	Factor change in mean						Mean
																				Back-transformed mean								SD of change as a factor
																				SD as a ×/÷ factor								Change in mean (%)
	For your data, you may have to set max and min values of X and Y axes to appropriate values.																			SD as a CV (%)								SD of change as CV (%)
									Measures of reliability via the RAW variable											Total no. of subjects	0	0	0	0	0	0	#REF!	Total no. of subjects	0	0	0	0	0	#REF!
									Raw	Trials	2-1	3-2	4-3	5-4	6-5	Mean											Measures of reliability via the LOG-TRANSFORMED variable
							P-Value			Change in mean	-0.018125								Clear #NUM! and "delete" from the log-transformed cells to stop them plotting as zeros.								Factors	Trials	2-1	3-2	4-3	5-4	6-5	Mean
							0.985411			Lower conf. limit	-2.09594								Restore the log-transformation formula to those cells if you enter new data.									Factor change in mean
										Upper conf. limit	2.05969																	Lower conf. limit
							CV			Conf. limits as ±value	2.07781																	Upper conf. limit
							8.81853			Typical error	2.75725					2.75725												Conf. limits as ×/÷factor
							6.51429			Lower conf. limit	2.0368					2.0368												Factor typical error
							13.6484			Upper conf. limit	4.26738					4.26738												Lower conf. limit
										Conf. limits as approx. ×/÷factor	1.44746					1.44746												Upper conf. limit
							ES			Bias correction factor	1.01667					1.01667												Conf. limits as approx. ×/÷factor
							-0.00184936			Smallest effect from pure SD	1.88097					#REF!												Bias correction factor
										Lower conf. limit	0.892713					#REF!												Smallest effect from pure SD
							BS-SD			Upper conf. limit	2.50583					#REF!												Lower conf. limit
							31.3456			Smallest effect from observed SD	1.96014					1.96014												Upper conf. limit
										Lower conf. limit	1.44796					#REF!												Smallest effect from observed SD
										Upper conf. limit	3.03369					#REF!												Lower conf. limit
										Degrees of freedom	15	0	0	0	0	15												Upper conf. limit
									Standardized (when ICC>0)																			Degrees of freedom	0	0	0	0	0
										Change in mean	-0.0019272																Percents
										Lower conf. limit	-0.222857																	Change in mean (%)
										Upper conf. limit	0.219003																	Lower conf. limit
										Conf. limits as ±value	0.22093																	Upper conf. limit
										Typical error	0.293173					0.281332												Conf. limits as approx. ±value
										Lower conf. limit	0.216569					0.207821												Typical error as a CV (%)
										Upper conf. limit	0.453742					0.435415												Lower conf. limit
										Conf. limits as approx. ×/÷factor	1.44746					1.44746												Upper conf. limit
										Bias correction factor	1.01667					1.01667												Conf. limits as approx. ×/÷factor
									Correlations																			Bias correction factor
										Pearson correlation	0.896485					0.896485												Smallest effect from pure SD
										Lower conf. limit	0.721335																	Lower conf. limit
										Upper conf. limit	0.963859																	Upper conf. limit
										Bias correction factor	1.00804																	Smallest effect from observed SD
										Intraclass correlation (ICC)	0.931621					#REF!												Lower conf. limit
										Lower conf. limit	0.816007					#REF!												Upper conf. limit
										Upper conf. limit	0.975565					#REF!											Standardized (when ICC>0)
										Effective no. of trials	2					#REF!												Change in mean
										F	28.2489					#REF!												Lower conf. limit
										Numerator DF	15					#REF!												Upper conf. limit
										Denominator DF	15	0	0	0	0	15												Conf. limits as ±value
										F lower	9.87001					#REF!												Typical error
										F upper	80.8509					#REF!												Lower conf. limit
										Fisher r	1.45402					1.45402												Upper conf. limit
										Fisher SE^-2	13																	Conf. limits as approx. ×/÷factor
										Pure variance	88.4513					#REF!												Bias correction factor
										SE of pure variance	34.9638					#REF!											Correlations
										LCL	19.9234					#REF!												Pearson correlation
										UCL	156.979					#REF!												Lower conf. limit
																												Upper conf. limit
																												Bias correction factor
																												Intraclass correlation
																												Lower conf. limit
																												Upper conf. limit
																											Measures of reliability of log-transformed variable
																													2-1	3-2	4-3	5-4	6-5	Mean
																												Change in mean
																												Lower conf. limit
																												Upper conf. limit
																												Typical error						#REF!
																												Lower conf. limit						#REF!
																												Upper conf. limit						#REF!
																												Bias correction factor
																												Smallest effect from pure SD						#REF!
																												Lower conf. limit						#REF!
																												Upper conf. limit						#REF!
																												Smallest effect from observed SD						#DIV/0!
																												Lower conf. limit						#REF!
																												Upper conf. limit						#REF!
																												DF	0	0	0	0	0	#REF!
																												Stdized change in mean
																												Lower conf. limit
																												Upper conf. limit
																												Stdized typical error
																												Lower conf. limit
																												Upper conf. limit
																												Pearson r						#DIV/0!
																												Lower conf. limit
																												Upper conf. limit
																												Bias correction factor
																												Intraclass r						#REF!
																												Lower conf. limit						#REF!
																												Upper conf. limit						#REF!
																												Effective no. of trials						#REF!
																												F						#REF!
																												Numerator DF	0					#REF!
																												Denominator DF	0	0	0	0	0	#REF!
																												F lower						#REF!
																												F upper						#REF!
																												Fisher r						#DIV/0!
																												Fisher SE^-2
																												Pure variance						#REF!
																												SE of pure variance						#REF!
																												LCL						#REF!
																												UCL						#REF!

## Sheet: Reliability_2-3 
	CONSECUTIVE PAIRWISE ANALYSIS OF TRIALS FOR RELIABILITY
	Hover cursor for citation:
	Hover cursor for updates:		2015	2012	2010	2009
	This spreadsheet calculates reliability statistics for consecutive pairs of trials and for the means of these statistics when there are >2 trials.
	For trials spaced at equal intervals, these means are better estimates of test-retest reliability than the more usual ANOVA-based reliablity statistics.
	But see the 1-way and 2-way spreadsheets in this workbook for such analyses.
	The reliability statistics are calculated for raw data and after log transformation.
	I generated the data shown with http://www.sportsci.org/2007/SimulateSamples.xls. See the accompanying article at http://www.sportsci.org/2007/wghstats.htm.
	I deliberately chose data with large errors that are clearly better analyzed via log transformation to give percent or factor effects and errors.
	Unless your data are times to exhaustion or gene transcription scores, they won't be so obviously in need of log transformaiton, but log transformaiton may still be better.
	Delete and replace the numbers in blue. Stats you might want are in red. Don't change any cells with a colored background.
	Missing values must be blanks or the graphs will display incorrectly. (The X values will plot as consecutive integers.)
	Clear all the #NUM! corresponding to missing raw values from the log-transformed panel. Restore the formula (by copying an adjacent cell) if you restore a missing value or for new data.
	Check the graphs (especially of the change scores) for outliers and non-uniformity of scatter. The log-transformed variables may show less non-uniformity, as evident in these data.
	For more than 20 subjects, COPY any number of rows after the first data row and INSERT in the same place without deselecting.
	Do NOT copy and insert the first data row.											Use analysis of RAW data in one or more of the following situations:										Use LOG transformation in one or more of the following situations:
	Double-click on any of the red mean or SD cells to check that you have done this operation properly.											the data can be zero or negative;										the data can only be positive and non-zero;
	Colored boxes should enclose all rows of your data.											the data were measured from an arbitrary reference value;										the within-subject, between-subject or between-trial SD is more than ~20% of the mean;
	For less than 20 subjects, delete or clear any unwanted or empty rows.											the magnitude of the error is expected to be similar for all subjects.										the magnitude of the percent or factor error is expected to be similar for all subjects.
	To remove a trial, clear its data, or set the corrresponding "Include which trials?" cell to 0 or blank.
	For more than 6 trials, copy and insert the entire column(s) for Trials 5 and/or 6 and their change scores for the RAW and the LOG data.											Missing values produce delete in the panel of change scores.										Missing values produce #NUM! in the panel of log-transformed data.							Missing values produce delete in the panel of change scores.
	And follow the instructions in the cells indicated by "Hover cursor for >6 trials". If such editing is too difficult for you, contact me.											Clear delete from these cells to stop them plotting as zeros.										Clear #NUM! from these cells to get complete analyses.							Clear delete from these cells to stop them plotting as zeros.
												Copy-paste or -drag to restore formulae to those cells if you enter new data.										Copy-paste or -drag to restore formulae to those cells if you enter new data.							Copy-paste or -drag to restore formulae to those cells if you enter new data.
		Choose smallest effect:	0.2
		Choose conf. limits (%):	95			Hover cursor for >6 trials:	Read	me				Hover cursor for >6 trials:	Read me	Read	me	Do not							Hover cursor for >6 trials:	Read me	Read	me	Do not			Hover cursor for >6 trials:	Read me	Read	me	Do not
		RAW Data									Change scores of raw data					modify	Any				100*LOG-Transformed Data						modify		Change scores of Log-transformed data					modify	Any
		Trial:	1	2	3	4	5	6	Mean		2-1	3-2	4-3	5-4	6-5	this col.	subject?				1	2	3	4	5	6	this col.		2-1	3-2	4-3	5-4	6-5	this col.	subject?
			41.91	39.54							-2.37	delete					1			S02	373.552	367.731							-5.82116						0
			43.97	41.04							-2.93	delete					1			S05	378.351	371.455							-6.89604						0
			35.8	33.3							-2.5	delete	delete	delete	delete		1			S07	357.795	350.556	#NUM!	#NUM!	#NUM!	#NUM!			-7.23905	delete	delete	delete	delete		#NUM!
			25.94	25.2							-0.74	delete	delete	delete	delete		1			S08	325.579	322.684	#NUM!	#NUM!	#NUM!	#NUM!			-2.89422	delete	delete	delete	delete		#NUM!
			27.38	30.43							3.05	delete	delete	delete	delete		1			S09	330.981	341.543	#NUM!	#NUM!	#NUM!	#NUM!			10.5616	delete	delete	delete	delete		#NUM!
			29.62	29.87							0.25	delete	delete	delete	delete		1			S10	338.845	339.685	#NUM!	#NUM!	#NUM!	#NUM!			0.840482	delete	delete	delete	delete		#NUM!
			18.21	24.01							5.8	delete	delete	delete	delete		1			S12	290.197	317.847	#NUM!	#NUM!	#NUM!	#NUM!			27.65	delete	delete	delete	delete		#NUM!
			25.51	26.07							0.56	delete	delete	delete	delete		1			S14	323.907	326.079	#NUM!	#NUM!	#NUM!	#NUM!			2.17147	delete	delete	delete	delete		#NUM!
			29.46	29.44							-0.02	delete	delete	delete	delete		1			S15	338.303	338.235	#NUM!	#NUM!	#NUM!	#NUM!			-0.0679117	delete	delete	delete	delete		#NUM!
			33.24	34.05							0.81	delete	delete	delete	delete		1			S16	350.375	352.783	#NUM!	#NUM!	#NUM!	#NUM!			2.40761	delete	delete	delete	delete		#NUM!
			36.55	41.04							4.49	delete	delete	delete	delete		1			S17	359.868	371.455	#NUM!	#NUM!	#NUM!	#NUM!			11.5866	delete	delete	delete	delete		#NUM!
			28.81	28.94							0.13	delete	delete	delete	delete		1			S20	336.072	336.522	#NUM!	#NUM!	#NUM!	#NUM!			0.450217	delete	delete	delete	delete		#NUM!
			31.81	29.19							-2.62	delete	delete	delete	delete		1			S22	345.978	337.383	#NUM!	#NUM!	#NUM!	#NUM!			-8.59545	delete	delete	delete	delete		#NUM!
			24.26	23.45							-0.81	delete	delete	delete	delete		1			S23	318.883	315.487	#NUM!	#NUM!	#NUM!	#NUM!			-3.39584	delete	delete	delete	delete		#NUM!
			24.76	32.49							7.73	delete	delete	delete	delete		1			S24	320.923	348.093	#NUM!	#NUM!	#NUM!	#NUM!			27.1703	delete	delete	delete	delete		#NUM!
			32.87	32.06							-0.81	delete	delete	delete	delete		1			S25	#REF!	#REF!	#NUM!	#NUM!	#NUM!	#NUM!			delete	delete	delete	delete	delete		#REF!
		Mean	30.6313	31.2575					30.9444	Mean of change	0.62625					Mean	#REF!			Mean							#DIV/0!	Mean							#REF!
		SD	9.68349	8.91775					9.3085	SD of change	3.12843					3.12843				SD							#DIV/0!	SD						#REF!
		Total no. of subjects	16	16	0	0	0	0	#REF!	Total no. of subjects	16	0	0	0	0	#REF!				N	0	0	0	0	0	0		N	0	0	0	0	0
		Include which trials?	1	1	1	1	0	0												Include which trials?	1	1	1	1	0	0
		DF	15	15	0	0	0	0	#REF!											DF	0	0	0	0	0	0	Mean	Factor change in mean						Mean
																				Back-transformed mean								SD of change as a factor
																				SD as a ×/÷ factor								Change in mean (%)
	For your data, you may have to set max and min values of X and Y axes to appropriate values.																			SD as a CV (%)								SD of change as CV (%)
									Measures of reliability via the RAW variable											Total no. of subjects	0	0	0	0	0	0	#REF!	Total no. of subjects	0	0	0	0	0	#REF!
									Raw	Trials	2-1	3-2	4-3	5-4	6-5	Mean											Measures of reliability via the LOG-TRANSFORMED variable
							P-Value			Change in mean	0.62625								Clear #NUM! and "delete" from the log-transformed cells to stop them plotting as zeros.								Factors	Trials	2-1	3-2	4-3	5-4	6-5	Mean
							0.435793			Lower conf. limit	-1.04077								Restore the log-transformation formula to those cells if you enter new data.									Factor change in mean
										Upper conf. limit	2.29327																	Lower conf. limit
							CV			Conf. limits as ±value	1.66702																	Upper conf. limit
							7.14874			Typical error	2.21213					2.21213												Conf. limits as ×/÷factor
							5.28081			Lower conf. limit	1.63411					1.63411												Factor typical error
							11.064			Upper conf. limit	3.4237					3.4237												Lower conf. limit
										Conf. limits as approx. ×/÷factor	1.44746					1.44746												Upper conf. limit
							ES			Bias correction factor	1.01667					1.01667												Conf. limits as approx. ×/÷factor
							0.0672772			Smallest effect from pure SD	1.80837					#REF!												Bias correction factor
										Lower conf. limit	0.890875					#REF!												Smallest effect from pure SD
							BS-SD			Upper conf. limit	2.39723					#REF!												Lower conf. limit
							30.0814			Smallest effect from observed SD	1.8617					1.8617												Upper conf. limit
										Lower conf. limit	1.37525					#REF!												Smallest effect from observed SD
										Upper conf. limit	2.88134					#REF!												Lower conf. limit
										Degrees of freedom	15	0	0	0	0	15												Upper conf. limit
									Standardized (when ICC>0)																			Degrees of freedom	0	0	0	0	0
										Change in mean	0.0692615																Percents
										Lower conf. limit	-0.115106																	Change in mean (%)
										Upper conf. limit	0.253629																	Lower conf. limit
										Conf. limits as ±value	0.184368																	Upper conf. limit
										Typical error	0.244656					0.237647												Conf. limits as approx. ±value
										Lower conf. limit	0.180728					0.175551												Typical error as a CV (%)
										Upper conf. limit	0.378651					0.367804												Lower conf. limit
										Conf. limits as approx. ×/÷factor	1.44746					1.44746												Upper conf. limit
										Bias correction factor	1.01667					1.01667												Conf. limits as approx. ×/÷factor
									Correlations																			Bias correction factor
										Pearson correlation	0.893366					0.893366												Smallest effect from pure SD
										Lower conf. limit	0.713736																	Lower conf. limit
										Upper conf. limit	0.96273																	Upper conf. limit
										Bias correction factor	1.00827																	Smallest effect from observed SD
										Intraclass correlation (ICC)	0.95149					#REF!												Lower conf. limit
										Lower conf. limit	0.867161					#REF!												Upper conf. limit
										Upper conf. limit	0.982779					#REF!											Standardized (when ICC>0)
										Effective no. of trials	2					#REF!												Change in mean
										F	40.229					#REF!												Lower conf. limit
										Numerator DF	15					#REF!												Upper conf. limit
										Denominator DF	15	0	0	0	0	15												Conf. limits as ±value
										F lower	14.0558					#REF!												Typical error
										F upper	115.139					#REF!												Lower conf. limit
										Fisher r	1.43836					1.43836												Upper conf. limit
										Fisher SE^-2	13																	Conf. limits as approx. ×/÷factor
										Pure variance	81.7546					#REF!												Bias correction factor
										SE of pure variance	31.5889					#REF!											Correlations
										LCL	19.8414					#REF!												Pearson correlation
										UCL	143.668					#REF!												Lower conf. limit
																												Upper conf. limit
																												Bias correction factor
																												Intraclass correlation
																												Lower conf. limit
																												Upper conf. limit
																											Measures of reliability of log-transformed variable
																													2-1	3-2	4-3	5-4	6-5	Mean
																												Change in mean
																												Lower conf. limit
																												Upper conf. limit
																												Typical error						#REF!
																												Lower conf. limit						#REF!
																												Upper conf. limit						#REF!
																												Bias correction factor
																												Smallest effect from pure SD						#REF!
																												Lower conf. limit						#REF!
																												Upper conf. limit						#REF!
																												Smallest effect from observed SD						#DIV/0!
																												Lower conf. limit						#REF!
																												Upper conf. limit						#REF!
																												DF	0	0	0	0	0	#REF!
																												Stdized change in mean
																												Lower conf. limit
																												Upper conf. limit
																												Stdized typical error
																												Lower conf. limit
																												Upper conf. limit
																												Pearson r						#DIV/0!
																												Lower conf. limit
																												Upper conf. limit
																												Bias correction factor
																												Intraclass r						#REF!
																												Lower conf. limit						#REF!
																												Upper conf. limit						#REF!
																												Effective no. of trials						#REF!
																												F						#REF!
																												Numerator DF	0					#REF!
																												Denominator DF	0	0	0	0	0	#REF!
																												F lower						#REF!
																												F upper						#REF!
																												Fisher r						#DIV/0!
																												Fisher SE^-2
																												Pure variance						#REF!
																												SE of pure variance						#REF!
																												LCL						#REF!
																												UCL						#REF!
